# Supplementary material for: Advanced atomic layer deposition (ALD): controlling the reaction kinetics and nucleation of metal thin films using electric-potential-assisted ALD
Source: Royal Society of Chemistry journal article supplement (doi:10.1039/d2tc04755a), 2023-01-01
Supplement: d2tc04755a1.pdf [file d2tc04755a1.pdf]

Supporting Information

# **Advanced Atomic Layer Deposition (ALD): Controlling Reaction Kinetics and Nucleation of Metal Thin Films Using Electric Potential Assisted ALD**

*Ji Won Han,<sup>‡</sup> Hyun Soo Jin,<sup>†‡</sup> Yoon Jeong Kim, Ji Sun Heo, Woo-Hee Kim,<sup>\*</sup> Ji-Hoon Ahn,<sup>\*</sup>  
and Tae Joo Park<sup>\*</sup>*

Department of Materials Science and Chemical Engineering, Hanyang University,  
Ansan 15588, Republic of Korea

<sup>†</sup>SK Hynix, Icheon 17336, Republic of Korea

E-mail:

Tae Joo Park : [tjp@hanyang.ac.kr](mailto:tjp@hanyang.ac.kr)

Woo-Hee Kim : [wooheekim@hanyang.ac.kr](mailto:wooheekim@hanyang.ac.kr)

Ji-Hoon Ahn : [ajh1820@hanyang.ac.kr](mailto:ajh1820@hanyang.ac.kr)

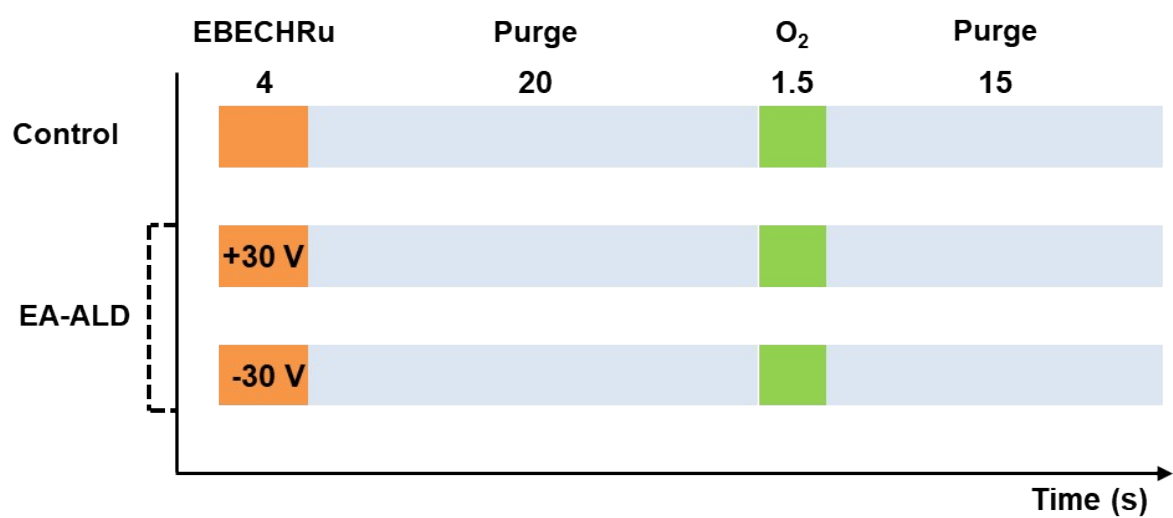

**Figure S1.** ALD process recipes of control ALD and EA-ALD with applied voltages of -30 V and +30 V.

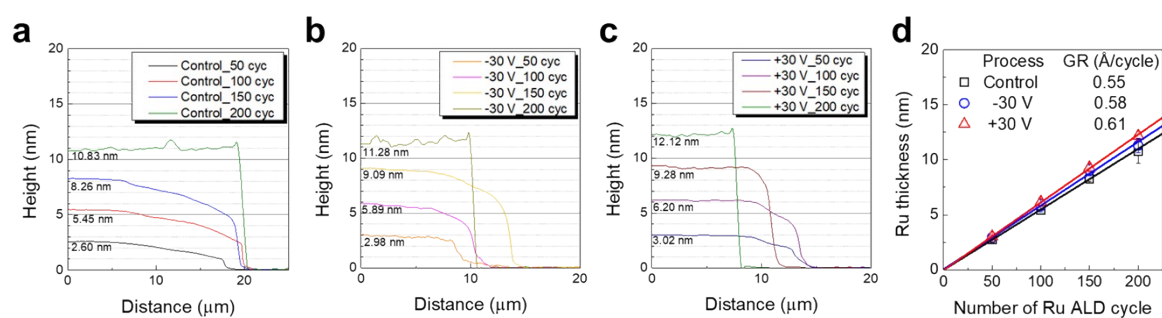

**Figure S2.**

AFM line profiles of patterned Ru films grown to 50, 100, 150 and 200 cycles using (a) control ALD and EA-ALD with (b) -30 V and (c) +30 V. (d) Growth rates of various Ru films.

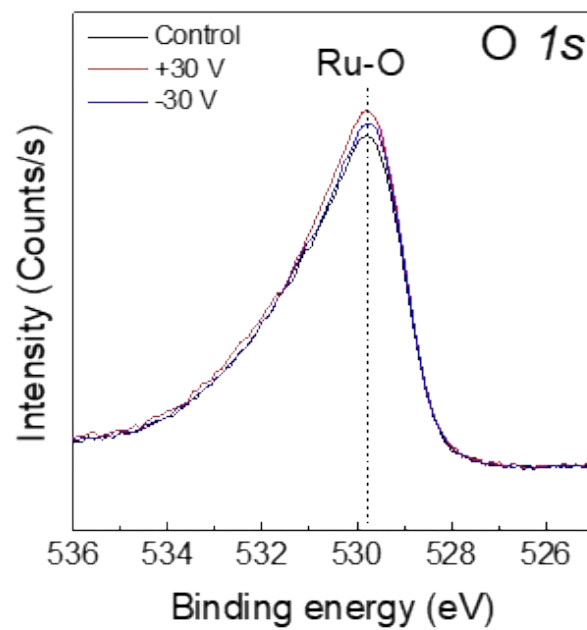

**Figure S3.** O 1s core level spectra of 40 nm-thick control Ru, -30 V Ru and +30 V Ru. Surface contaminant was removed by surface sputtering.

**1. Substrate preparation**

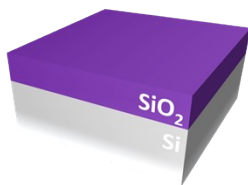

**2. Ru deposition**

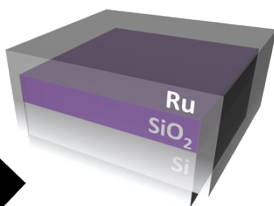

**3. TiN electrode deposition**

- DC magnetron sputtering  
with shadow mask

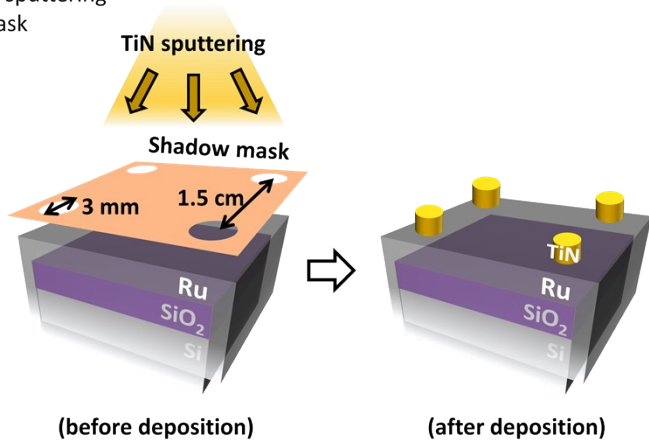

**4. Ru film insulation**

- cut off 4 edges of sample

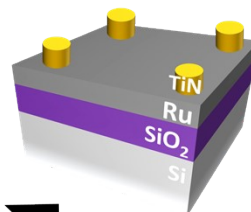

**Figure S4.**

Schematics of TiN electrode fabrication process for electrical measurements.
